# Supplementary material for: Low-affinity CD4+ T cells are major responders in the primary immune response
Source: PubMed Central journal article supplement (PMC5234832; doi:10.1038/ncomms13848), 2016-12-15
Supplement: ncomms13848-s1.pdf [file ncomms13848-s1.pdf]

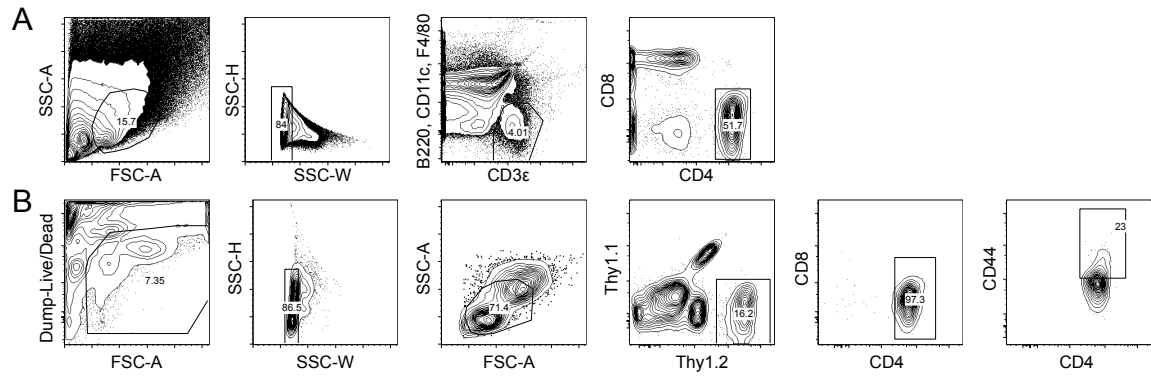

Supplementary Figure 1. Identification of antigen-specific donor cells in WT LDA.

(A) Gating strategy for Thy1.2 CD4 T cell transfer into WT (Thy1.1) mice

following tetramer+ LDA. (B) Gating strategy for Thy1.2 CD4 T cells into Thy1.1

mice for LDA low-affinity CD4 T cell calculations.

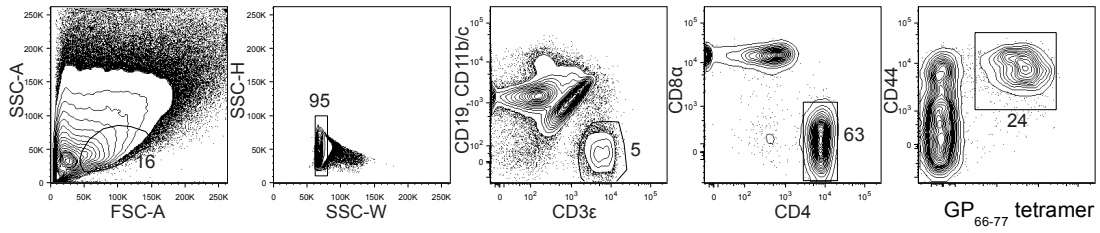

Supplementary Figure 2. Identification of antigen-specific CD4<sup>+</sup> T cells by tetramer.

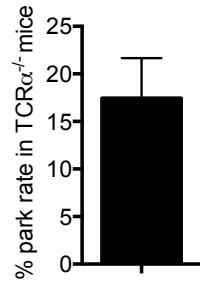

Supplementary Figure 3. Park rate of CD4 T cells 24 hours after IV transfer into TCR $\alpha^{-/-}$  mice as a percent of input (n=4 mice, two experiments, data shown as mean +/- SEM).

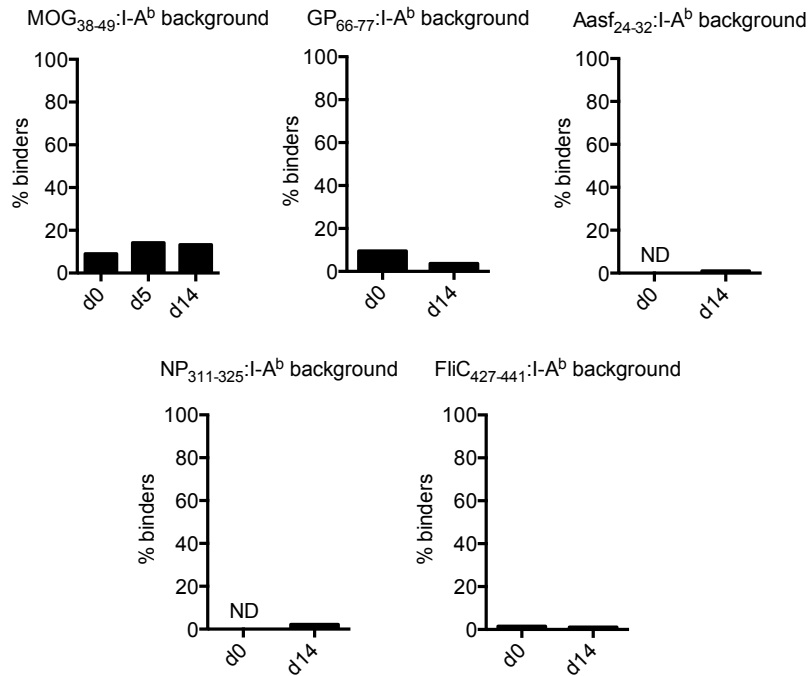

Supplementary Figure 4. MP background calculation (data shown as mean frequency of binders for all points, 2 mice per timepoint).

| Target  | Fluorochrome  | Clone       | Host             | Isotype               | Manufacturer      | Cat#            | Reference |
|---------|---------------|-------------|------------------|-----------------------|-------------------|-----------------|-----------|
| CD3e    | BV 605        | 145-2C11    | Hamster          | IgG1, κ               | Biologend         | 100351          | 1         |
| CD4     | BV 510        | RM4-5       | Rat              | IgG <sub>2a</sub> , κ | Biologend         | 100553          | 2         |
| CD8α    | V450          | 53-6.7      | Rat              | IgG <sub>2a</sub> , κ | Tonbo Biosciences | 75-0081-U100    | 3         |
| CD11b   | PerCp/APC Cy7 | M1/70       | Rat              | IgG <sub>2b</sub> , κ | BD Pharmigen      | 561114 / 561039 | 4         |
| CD11c   | PerCp/APC-Cy7 | HL3         | Hamster          | IgG1, λ2              | BD Pharmigen      | 560584 / 561241 | 5         |
| CD19    | PerCp         | 1D3         | Rat              | IgG <sub>2a</sub> , κ | BD Pharmigen      | 551001          | 6         |
| CD44    | AF700         | IM7         | Rat              | IgG <sub>2b</sub> , κ | eBioscience       | 56-0441-82      | 7         |
| CD69    | BV605         | H1.2F3      | Hamster          | IgG1, λ3              | BioLegend         | 104529          | 8         |
| F4/80   | APC-Cy7       | BM8         | Rat              | IgG <sub>2a</sub> , κ | eBioscience       | 47-4801         | 9         |
| Nur77   | PE            | 12.14       | Mouse            | IgG1                  | eBioscience       | 12-5965         | 10        |
| TCRβ    | PE            | H57-597     | Armenian Hamster | IgG                   | eBioscience       | 12-5961         | 11        |
| B220    | APC-eFluor780 | RA3-6B2     | Rat              | IgG <sub>2a</sub> , κ | eBioscience       | 47-0452         | 12        |
| Thy1.1  | PerCp         | HIS51       | Mouse            | IgG <sub>2a</sub> , κ | eBioscience       | 45-0900         | 13        |
| Thy1.2  | APC           | 53-2.1      | Rat LOU          | IgG <sub>2a</sub> , κ | BD Pharmigen      | 561974          | 14        |
| I-A/I-E | PE            | M5/114.15.2 | Rat BNxLEW       | IgG <sub>2b</sub> , κ | BD Pharmigen      | 557000          | 15        |
| Bcl-6   | PE-CF594      | K112-91     | Mouse            | IgG <sub>1</sub> , κ  | BD Horizon        | 562401          | 16        |

Supplementary Table 1. Antibodies used in experiments.

## References

1. Leo O, Foo M, Sachs DH, Samelson LE, Bluestone JA. Identification of a monoclonal antibody specific for a murine T3 polypeptide. Proc Natl Acad Sci U S A. 1987 Mar;84(5):1374-8
2. Shi Y, Kaliyaperumal A, Lu L, Southwood S, Sette A, Michaels MA, Datta SK. Promiscuous presentation and recognition of nucleosomal autoepitopes in lupus: role of autoimmune T cell receptor alpha chain. J Exp Med. 1998 Feb 2;187(3):367-78.
3. Ledbetter, J. A. and L. A. Herzenberg. Xenogeneic monoclonal antibodies to mouse lymphoid differentiation antigens. Immunol Rev. 1979;47:63-90.
4. Springer, T., G. Galfre, et al. 1978. Monoclonal xenogeneic antibodies to murine cell surface antigens: identification of novel leukocyte differentiation antigens. Eur J Immunol 8(8): 539-51. / Springer, T., G. Galfre, et al. 1979. Mac-1: a macrophage differentiation antigen identified by monoclonal antibody. Eur J Immunol 9(4): 301-6.
5. Metlay JP, Witmer-Pack MD, Agger R, Crowley MT, Lawless D, Steinman RM. The distinct leukocyte integrins of mouse spleen dendritic cells as identified with new hamster monoclonal antibodies. J Exp Med. 1990; 171(5):1753-

1771 / Pulendran B, Lingappa J, Kennedy MK, et al. Developmental pathways of dendritic cells in vivo: distinct function, phenotype, and localization of dendritic cell subsets in FLT3 ligand-treated mice. *J Immunol.* 1997; 159(5):2222-2231

6. Krop I, Shaffer AL, Fearon DT, Schlissel MS. The signaling activity of murine CD19 is regulated during cell development. *J Immunol.* 1996 Jul 1;157(1):48-56.
7. Trowbridge, I. S., J. Lesley, et al. 1982. Biochemical characterization and cellular distribution of a polymorphic, murine cell-surface glycoprotein expressed on lymphoid tissues. *Immunogenetics* 15(3): 299-312.
8. Yokoyama, W. M., F. Koning, et al. (1988). "Characterization of a cell surface-expressed disulfide-linked dimer involved in murine T cell activation." *J Immunol* 141(2): 369-76.
9. Leenen PJ, de Bruijn MF, Voerman JS, Campbell PA, van Ewijk W. Markers of mouse macrophage development detected by monoclonal antibodies. *J Immunol Methods.* 1994. 174(1-2):5-19.
10. Hazel TG, Mirsa R, Davis IJ, Greenberg ME, Lau LF. Nur77 is differently modified in PC12 cells upon membrane depolarization and growth factor treatment. *Mol Cell Biol.* 1991; 11(6):3229-3246.
11. Kubo RT, Born W, Kappler JW, Marrack P, Pigeon M. Characterization of a monoclonal antibody which detects all murine alpha beta T cell receptors. *J Immunol.* 1989 Apr 15;142(8):2736-42.
12. Morse, H. C. d., W. F. Davidson, et al. 1982. Abnormalities induced by the mutant gene *lpr*: expansion of a unique lymphocyte subset. *J Immunol.* 129(6): 2612-5.
13. Hermans, M. H. and D. Opstelten 1991. In situ visualization of hemopoietic cell subsets and stromal elements in rat and mouse bone marrow by immunostaining of frozen sections. *J Histochem Cytochem* 39(12): 1627-34.
14. Ledbetter, J. A. and L. A. Herzenberg. Xenogeneic monoclonal antibodies to mouse lymphoid differentiation antigens. *Immunol Rev.* 1979;47:63-90.
15. Bhattacharya A, Dorf, M E and Springer T A. A shared alloantigenic determinant on Ia antigens encoded by the I-A and I-E subregions: evidence for I region gene duplication. *J Immunol* 1981 127:2488-95.
16. Choi, Kageyama, Eto et al.: "ICOS receptor instructs T follicular helper cell versus effector cell differentiation via induction of the transcriptional repressor Bcl6." in: *Immunity*, Vol. 34, Issue 6, pp. 932-46, 2011
